1 **Title**

2 Effects of visual attention modulation on dynamic effective connectivity and visual fixation during own-  
3 face viewing in body dysmorphic disorder

4  
5 **Running Title**

6 Dynamic effective connectivity in BDD

7  
8 **Authors**

9 Wan-wa Wong<sup>1</sup>, D. Rangaprakash<sup>2</sup>, Joel P. Diaz-Fong<sup>1</sup>, Natalie M. Rotstein<sup>1</sup>, Gerhard S. Hellemann<sup>3</sup>,  
10 Jamie D. Feusner<sup>1</sup>

11  
12 <sup>1</sup>Department of Psychiatry and Biobehavioral Sciences, David Geffen School of Medicine, University of  
13 California Los Angeles, Los Angeles, CA, United States

14 <sup>2</sup>Athinoula A. Martinos Center for Biomedical Imaging, Massachusetts General Hospital, Harvard  
15 Medical School, Charlestown, MA, United States

16 <sup>3</sup>Department of Biostatistics, School of Public Health, University of Alabama at Birmingham,  
17 Birmingham, Alabama

18  
19 Address correspondence to Wan-wa Wong, Department of Psychiatry and Biobehavioral Sciences, David  
20 Geffen School of Medicine, University of California Los Angeles, Los Angeles, CA, USA. Email:  
21 [wwwong@mednet.ucla.edu](mailto:wwwong@mednet.ucla.edu)

22  
23 **Abstract**

24 **Background:** In individuals with body dysmorphic disorder (BDD), selective attention biases and aberrant  
25 visual scanning patterns may cause imbalances in global vs. detailed visual processing, contributing to  
26 perceptual distortions for appearance. The mechanistic effects of modifying visual attention on brain  
27 function in BDD, which may be critical to developing perceptual-based treatments, have not been  
28 explored. This study tested the effects of visual-attention modulation on dorsal and ventral visual stream  
29 activation and connectivity, and eye behaviors.

30 **Methods:** We acquired functional magnetic resonance imaging data in 37 unmedicated adults with BDD  
31 and 30 controls. Participants viewed their faces under two conditions: a) unconstrained (naturalistically),  
32 and b) holding their gaze on the center of the image (visual-attention modulation), monitored with an eye-  
33 tracking camera. We analyzed activation and dynamic effective connectivity in dorsal and ventral visual  
34 streams and visual fixation duration.

35 **Results:** Visual-attention modulation resulted in longer fixation duration and reduced activation in dorsal  
36 and ventral visual streams in both groups compared with naturalistic viewing. Longer fixation duration  
37 was associated with greater effective connectivity from V1 to early dorsal visual stream during the second  
38 naturalistic viewing, across groups. During naturalistic viewing, there was greater V1 to early dorsal  
39 visual stream connectivity after, compared with before, visual-attention modulation.

40 **Conclusions:** When viewing one's face, longer visual fixation may confer greater communication in  
41 dorsal visual system, facilitating global/holistic visual processing. The finding that reduction in visual  
42 scanning while viewing one's face results in persistent effects during unconstrained viewing has  
43 implications for perceptual retraining treatment design for BDD.

44  
45 **Keywords**

46 Body dysmorphic disorder, Time-varying effective connectivity, Face processing, Visual attention  
47 modulation, Dorsal and ventral visual streams

48

## 49 **1 Introduction**

50 Body dysmorphic disorder (BDD) is marked by preoccupations with misperceived appearance defects,  
51 which sufferers believe render them ugly and deformed, and repetitive behaviors to check or fix one's  
52 appearance. Commonly misperceived appearance features involve the face and head, although any body  
53 part can be of concern (1). The consequences can be profound, with high lifetime prevalence of suicide  
54 attempts (25%) (2) and hospitalization (50%) (3). 27 to 39 percent are delusional in their beliefs (4). BDD  
55 is still under-recognized, misdiagnosed, and understudied, although BDD has a high prevalence of ~2% in  
56 the general population (5). Some neurobiological models to explain vulnerability to BDD have been put  
57 forth (e.g., (6,7)) but a comprehensive understanding of this condition is still emerging.

58 Disturbances of visual information processing in BDD are likely critical neurobiological  
59 contributors to the core psychopathological feature of perceptual distortions of appearance (6,8). Our  
60 previous neuroimaging studies provide support for this premise. Using own-face (9), other-face (10), and  
61 house (11) stimuli as probes in functional magnetic resonance imaging (fMRI) studies, we found  
62 abnormally reduced activity in the dorsal visual stream (DVS) when viewing filtered images that  
63 contained only low spatial frequency information (i.e. conveying configural and holistic information).  
64 This led to the hypothesis that the hyper-scrutiny of miniscule appearance details could be  
65 mechanistically related to failing to “see” the appearance feature as an integrated whole, which may  
66 reflect an imbalance in global and local processing. This hypothesis has gained support from subsequent  
67 imaging and electro-cortical evidence (12,13). Adding to the hypothesized model, enhanced ventral visual  
68 stream (VVS) processing of high-detail images, and perception of faces as more unattractive when the  
69 magnitude of detailed processing increases, were found (12). Neuropsychological and psychophysical  
70 studies testing face and body inversion effects have corroborated the model of imbalance in global vs.  
71 local processing (14–19).

72 Further, selective attention biases potentially contribute to its psychopathological features (20).  
73 This could include aberrant patterns of visual attention, with excessive visual attention paid to perceived  
74 appearance defects, which is commonly observed phenomenologically (21). Studies using eye-tracking in

75 BDD have found biased attention to facial areas deemed flawed, and a scanning pattern characterized by  
76 multiple fixations of brief duration (22,23).

77 In addition to psychophysical and visual task brain activation studies, functional connectivity  
78 (FC) studies have also been conducted in BDD (24,25). During an others' face-viewing task, the BDD  
79 group demonstrated aberrant connectivity for low spatial frequency images within a face-processing  
80 network in the visual and temporal cortices, as well as between the fusiform face area and  
81 precuneus/posterior cingulate and insula (24). During a body-viewing task, individuals with BDD  
82 demonstrated reduced dorsal visual network connectivity (measured via independent component analysis)  
83 compared with healthy controls (25). These studies, testing face-processing and body-processing  
84 networks, resulted in findings consistent with a model of imbalances in global vs. local visual processing.

85 Given the phenomenology and the previous research in BDD, some current and proposed  
86 treatment approaches (26–28) incorporate visual-attention modifications. Yet, the neural mechanisms  
87 underlying aberrant visual attention and how the neurobiological substrates of potential targets are  
88 engaged by different visual-attention modification approaches are incompletely understood. A  
89 mechanistic understanding is critical for the development of, and ability to iteratively refine, effective  
90 clinical treatments.

91 We therefore designed an experiment to test the neurobiological mechanistic effects of a strategy  
92 of visual-attention modification (29). This strategy requires participants to visually fixate on a centered  
93 cross overlaid on their face photo, with eye-tracking camera monitoring. The purpose is to reduce visual  
94 scanning while viewing their face to enhance DVS activity, responsible for global/holistic visual  
95 processing, and to suppress VVS activity, responsible for detailed/analytic visual processing.

96 To examine directional connectivity, we employed dynamic effective connectivity (DEC)  
97 modeling (30) to assess connectivity changes from primary visual cortex (V1) to DVS and V1 to VVS  
98 over time in different viewing conditions (i.e. unconstrained “natural” viewing of their faces, NatV, and  
99 modulated viewing with fixation at a centered cross, ModV). In previous studies we found evidence of  
100 hypoactivation in early visual cortical areas such as V1 and early V2 for viewing own faces (9); as well as

101 hypoactivation in later occipital (V2, V3) and parietal DVS regions, and hyperactivation in temporal  
102 fusiform VVS regions for viewing others' faces (12). The primary goal was to investigate the effects of  
103 visual-attention modulation on the DVS and VVS activation and connectivity during own-face viewing  
104 within BDD and healthy controls. Secondly, we explored if the modulation had differential effects  
105 between groups by comparing differences in brain activation, connectivity and visual fixation. We  
106 hypothesized increase fixation duration during ModV compared to NatV across groups, and that fixation  
107 duration would correlate with activation and connectivity in DVS. In addition, we hypothesized that  
108 ModV would enhance DVS and suppress VVS activation across groups. We also hypothesized increased  
109 connectivity from V1 to DVS and decreased connectivity from V1 to VVS during ModV compared to the  
110 first NatV in BDD and controls. Further, we hypothesized that during NatV after ModV there would be  
111 significant effects on DEC patterns within BDD and controls compared to the first NatV (i.e. a  
112 "carryover" effect of the ModV). Finally, we hypothesized that in BDD compared to controls there would  
113 be lower connectivity from V1 to DVS and higher connectivity from V1 to VVS during both ModV and  
114 NatV.

115

## 116 **2 Materials and Methods**

### 117 **2.1 Participants**

118 The UCLA Institutional Review Board approved the study. All participants provided informed written  
119 consent. Forty-three unmedicated adults with BDD and 35 healthy controls (CON) aged 18-40 years were  
120 recruited from the community and were enrolled. BDD participants met DSM-5 criteria for BDD, with  
121 face concerns. Those with concerns specifically about the region between their eyes were excluded due to  
122 the nature of ModV task. BDD participants could have comorbid depressive or anxiety disorders, since  
123 they commonly co-occur (See Supplementary Material S1 for exclusion criteria).

### 124 **2.2 Clinical assessments**

125 Eligibility was determined through telephone screening followed by a clinical interview with the study  
126 physician (JDF). The Mini International Neuropsychiatric Interview (MINI) and BDD Module (31,32)

127 were administered. The Yale-Brown Obsessive-Compulsive Scale Modified for BDD (BDD-YBOCS)  
128 (33), Montgomery-Åsberg Depression Rating Scale (MADRS) (34), Brown Assessment of Beliefs Scale  
129 (BABS) (35), and the Hamilton Anxiety Scale (HAMA) (36) were administered (See Supplementary  
130 Material S2 for assessment details).

### 131 **2.3 Task paradigm**

132 There were two sets of stimuli for the NatV condition: photos of participant's face and scrambled faces as  
133 the control task (Figure 1a). There were also two sets of stimuli for ModV condition: the same photos  
134 overlaid with a semi-transparent crosshair between the eyes, and the scrambled faces with a crosshair  
135 (Figure 1b).

136 FMRI data were acquired while participants underwent two conditions. During NatV, participants  
137 were instructed to view the (unaltered) photos of their face and scrambled images of their face as they  
138 normally do. During ModV, they were instructed to view the same images while maintaining attention  
139 and eye gaze on the crosshair.

140 Participants were randomly assigned to one of the two counterbalanced groups for three fMRI  
141 runs: NatV-NatV-ModV (NNM) or NatV-ModV-NatV (NMN). They were instructed to press a button  
142 every time an image disappeared from the screen to ensure vigilance. Moreover, high-resolution MR-  
143 compatible display goggles (VisuaStimXGA, Resonance Technology, Inc.) with a right-side mounted  
144 infrared camera was used to present stimuli and record eye gaze. ViewPoint EyeTracker software  
145 (Arrington Research, Inc.) sampled pupil location at a rate of 30Hz. A 9-point calibration was used to  
146 normalize the eye gaze position relative to the screen. All values were normalized with respect to mapped  
147 x-axis and y-axis gaze values in a range of 0.0 to 1.0.

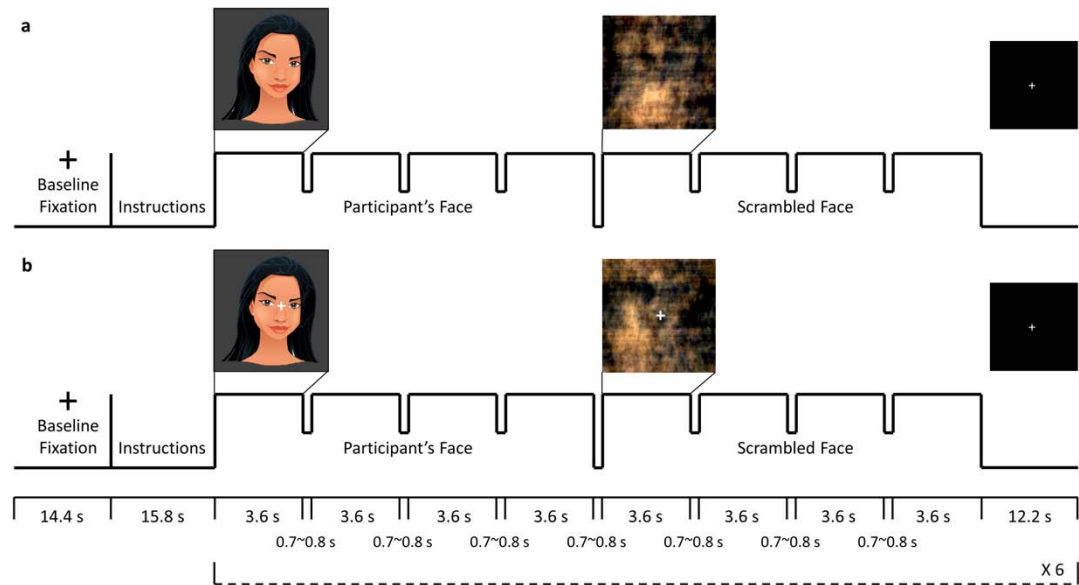

148

149

150

151

152

153

154

155

156

157

158

159

160

161

162

**Figure 1** *fMRI* task paradigm. Four color photos of participants' own faces at different, standardized angles were captured before the MRI session. A blocked design was used for the presentation of participant's own face and scrambled face control stimuli for both (a) natural viewing and (b) visual modulation runs. The first 4 images were participant's faces at different angles, and the next 4 images were scrambled faces. Each image was presented for 3.6 s, with a brief gap of 0.7-0.8 s for changing the image. A fixation with duration of 12.2 s was shown after the stimuli. The presentation of participant's face and scrambled face stimuli was repeated six times in a single run. The stimuli for the visual modulation run (b) had a semi-transparent crosshair between the eyes of the participants' faces and in the center of the scrambled faces. For the visual modulation run, participants were required to maintain their gaze on the crosshair. The rationale was that fixating visual gaze on the crosshair would reduce scanning associated with piecemeal/detailed processing and enhance holistic/global visual processing. To ensure task compliance for viewing the photos and crosshairs, gaze location was continuously monitored with the camera by the experimenters during the scan.

163

## 164 **2.4 MRI data acquisition and preprocessing**

165 MRI data were acquired on a 3T Siemens Prisma scanner. Data preprocessing was done using fMRIPrep  
166 1.4.0 (37). See Supplementary Material S3-S5 for details of data acquisition and preprocessing, including  
167 quality control and motion correction.

## 168 **2.5 Brain activation analysis**

169 The preprocessed fMRI data were analyzed with a general linear model using FEAT in FSL 5.0.9 (38,39).  
170 For lower-level analysis, two different levels of contrasts (1<sup>st</sup> level: unaltered face stimuli vs. fixation  
171 (baseline); 2<sup>nd</sup> level: 1<sup>st</sup> NatV vs. 2<sup>nd</sup> NatV, 1<sup>st</sup> NatV vs. ModV) were used. For higher-level analysis,  
172 group levels of contrasts (within-group level: BDD and CON; between-group level: BDD vs. CON) were  
173 used. We used DVS and VVS masks to test hypotheses regarding activation in these systems. See  
174 Supplementary Material S6 for more information.

## 175 **2.6 Brain connectivity analysis**

176 Fourteen regions-of-interest (ROIs) were derived from the Neurosynth (<https://neurosynth.org/>) functional  
177 meta-analysis in DVS and VVS (Figure 2). Blind-deconvolution (40) was performed on the timeseries  
178 extracted from these ROIs to minimize intra-subject variability in hemodynamic response function (HRF)  
179 (41) and to improve estimation of effective connectivity (42). DEC, a time-varying measure of directional  
180 connectivity between pairs of ROIs, was computed at each time point using time-varying Granger  
181 causality (GC) (30). The deconvolved timeseries were fitted into a dynamic multivariate autoregressive  
182 (dMVAR) model for estimating DEC between ROIs, which was solved in a Kalman-filter framework.  
183 The dMVAR model coefficients vary as a function of time, whose lengths were identical to the number of  
184 timepoints in the timeseries. See Supplementary Material S7 for more information. Twelve intra-  
185 hemispheric connections were chosen and divided into 4 categories: 1) VVS<sub>Lower</sub> (*Calcarine to IOG*), 2)  
186 VVS<sub>Higher</sub> (*IOG to FG; IOG to ITG*), 3) DVS<sub>Lower</sub> (*Calcarine to SOG*), and 4) DVS<sub>Higher</sub> (*SOG to IPL;*  
187 *SOG to SPL*) (Figure 2). From these twelve connections, the timepoints associated with those trials of  
188 viewing unaltered faces were extracted for subsequent statistical analysis.



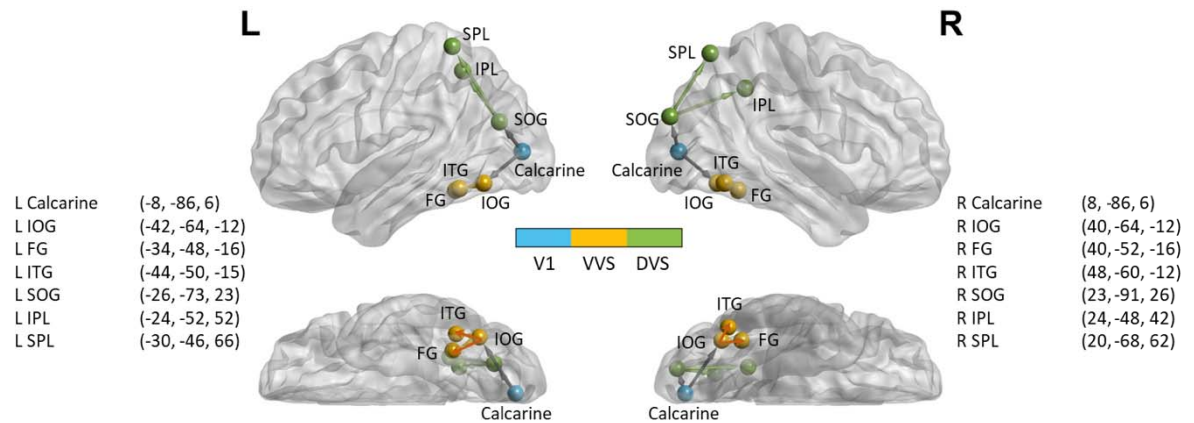

189

190

191

192

193

194

195

196

197

198

199

200

201

## 202 2.7 Gaze analysis

203

204

205

206

207

**Figure 2** Locations of the 14 spherical ROIs used for dynamic effective connectivity analysis, overlaid on a brain surface with lateral and ventral views. The ROIs in the visual areas were defined using Neurosynth (<https://neurosynth.org/>) with the search terms including “primary visual”, “ventral visual”, “visual stream”, and “dorsal visual” to obtain maps generated with association tests. Clusters in the visual areas included 2 ROIs in V1 [bilateral calcarine], 6 ROIs in VVS [bilateral inferior occipital gyrus (IOG), fusiform gyrus (FG), and inferior temporal gyrus (ITG)], and 6 ROIs in DVS [bilateral superior occipital gyrus (SOG), inferior parietal lobule (IPL), and superior parietal lobule (SPL)]. The nomenclature is based on Eickhoff-Zilles macro labels from N27, implemented in AFNI. All spheres had a radius of 5 mm and the center-of-mass coordinates obtained from the clusters are x, y and z in the MNI space. This figure was prepared using BrainNet Viewer (43).

Pupil data were filtered with default settings in the ViewPoint software. Blinks were removed using a blink detection algorithm for low-speed eye-tracking (44). Missing values of less than four consecutive data points (~133ms) were linearly interpolated, to correct for flicker and loss of contact, considering that saccades typically take 100-130ms to program (45,46). Gaze position values were then smoothed using a Savitzky-Golay filter (47), a simplified least square procedure which is suggested to perform well in low-



208 speed eye-tracking that contains saccade amplitude greater than 5° (48). Fixations were identified using a  
209 velocity threshold algorithm (49) with a velocity threshold of 0.10°/s and a drift threshold of 0.30°/s.  
210 Fixations of less than 100ms were excluded from the analysis. Mean fixation duration was the main  
211 outcome variable to quantify fixation patterns when participants viewed their faces during the face  
212 stimuli.

## 213 **2.8 Statistical analysis**

214 Linear mixed models (LMM) were used to study whether the DEC was significantly influenced by  
215 experimental factors. Group (BDD or CON), order (NNM or NMN), run (1<sup>st</sup> or 2<sup>nd</sup> or 3<sup>rd</sup> run), level  
216 (Lower or Higher), and their interactions were included in the model as fixed factors, with participant ID  
217 as random factor. Pairwise comparisons with Bonferroni correction ( $p < 0.05$ ) were performed afterwards  
218 to determine which factors significantly differed from each other. The LMM analysis was done for the  
219 separate DVS and VVS hypotheses. General linear model was used to analyze the mean fixation duration  
220 from eye-tracking data (within-subjects factor: run; between-subjects factors: group and order). If a  
221 significant three-way interaction effect was found, simple two-way interaction, simple-simple main effect,  
222 and simple-simple pairwise comparisons were computed post-hoc. Pearson correlation was used as  
223 exploratory follow-up analysis to determine associations between DEC, symptom severity measures of  
224 BDD-YBOCS and BABS, and mean fixation duration. Statistical tests were done using SPSS and R.

225

## 226 **3 Results**

### 227 **3.1 Sample characteristics**

228 Forty-three BDD participants and 35 CON were eligible and scanned. Among these, we excluded one  
229 BDD and one CON due to task noncompliance, four BDD and four CON due to excessive motion  
230 artifacts, and one BDD due to fMRIPrep errors. Thirty-seven BDD and 30 CON were finally included in  
231 the subsequent analyses (Table 1).

232 **Table 1** Sample characteristics

|                                                  | <b>BDD</b><br>(n=37) | <b>CON</b><br>(n=30) | <b>Between-group statistics</b> |      |         |
|--------------------------------------------------|----------------------|----------------------|---------------------------------|------|---------|
|                                                  |                      |                      | $\chi^2$                        | t    | p-value |
| <b>Sex (Male/Female)</b>                         | 6/31                 | 8/22                 | 1.09                            |      | 0.30    |
| <b>Age (Years)</b>                               | 24.8 ± 6.8           | 23.2 ± 6.8           |                                 | 1.00 | 0.32    |
| <b>Symptoms Severity</b>                         |                      |                      |                                 |      |         |
| HAMA                                             | 9.9 ± 7.2            | 2.5 ± 2.3            |                                 | 5.44 | <0.001  |
| MADRS                                            | 12.1 ± 9.1           | 1.1 ± 1.3            |                                 | 6.55 | <0.001  |
| BDD-YBOCS                                        | 26.8 ± 4.2           | NA                   |                                 |      |         |
| BABS                                             | 15.2 ± 4.5           | NA                   |                                 |      |         |
| <b>Psychiatric Comorbidities</b>                 |                      |                      |                                 |      |         |
| Major depressive episode                         | 6                    |                      |                                 |      |         |
| Persistent depressive disorder<br>(dysthymia)    | 5                    |                      |                                 |      |         |
| Panic disorder with<br>agoraphobia               | 2                    |                      |                                 |      |         |
| Agoraphobia without history<br>of panic disorder | 1                    |                      |                                 |      |         |
| Social phobia                                    | 5                    |                      |                                 |      |         |
| PTSD                                             | 2                    |                      |                                 |      |         |
| Generalized anxiety disorder                     | 11                   |                      |                                 |      |         |
| No DSM comorbid disorder                         | 18                   |                      |                                 |      |         |

233 BDD = body dysmorphic disorder; CON = control; HAMA = Hamilton Anxiety Scale; MADRS =

234 Montgomery-Asberg Depression Rating Scale; BDD-YBOCS = Yale-Brown Obsessive-Compulsive

235 Scale Modified for BDD; BABS = Brown Assessment of Beliefs Scale; PTSD = Post-traumatic Stress

236 Disorder;  $\chi^2$  = chi-square test; t = independent-samples t-test.

### 237 3.2 Gaze patterns

238 Nine participants were excluded for the eye-tracking analysis: three BDD due to device malfunction, two  
239 BDD due to noncompliance, and two BDD and two CON due to poor data quality. A three-way mixed  
240 ANOVA was performed to evaluate the effects of group, order and run on the mean fixation duration.  
241 There was no significant three-way interaction between group, order and run,  $F(1.74,83.62)=2.27$ ,  $p=0.12$ .  
242 There was significant two-way interaction between order and run,  $F(1.74,83.62)=16.03$ ,  $p<0.001$ .  
243 Following this up by a simple main effect analysis with a Bonferroni adjustment (statistical significance  
244 being accepted at  $p<0.025$ ), there were significant simple main effects of run on the mean fixation  
245 duration for the NMN order,  $F(1.57,36.2)=7.74$ ,  $p=0.003$ , and for the NNM order,  $F(1.44,38.9)=11.9$ ,  
246  $p=0.0004$ . Simple pairwise comparisons were computed between runs for the NMN and NNM orders,  
247 with a Bonferroni adjustment. The mean fixation duration was significantly different between the 1<sup>st</sup> and  
248 3<sup>rd</sup> runs (ModV > 1<sup>st</sup> NatV,  $p=0.023$ ), and between the 2<sup>nd</sup> and 3<sup>rd</sup> runs (ModV > 2<sup>nd</sup> NatV,  $p=0.014$ ) for  
249 the NNM order. There was a trend between the 2<sup>nd</sup> and 3<sup>rd</sup> runs (ModV > 2<sup>nd</sup> NatV,  $p=0.065$ ) for the  
250 NMN order (Figure 3). In sum, across groups and for both NNM and NMN orders, as expected the mean  
251 fixation duration lasted longer during ModV compared to NatV.

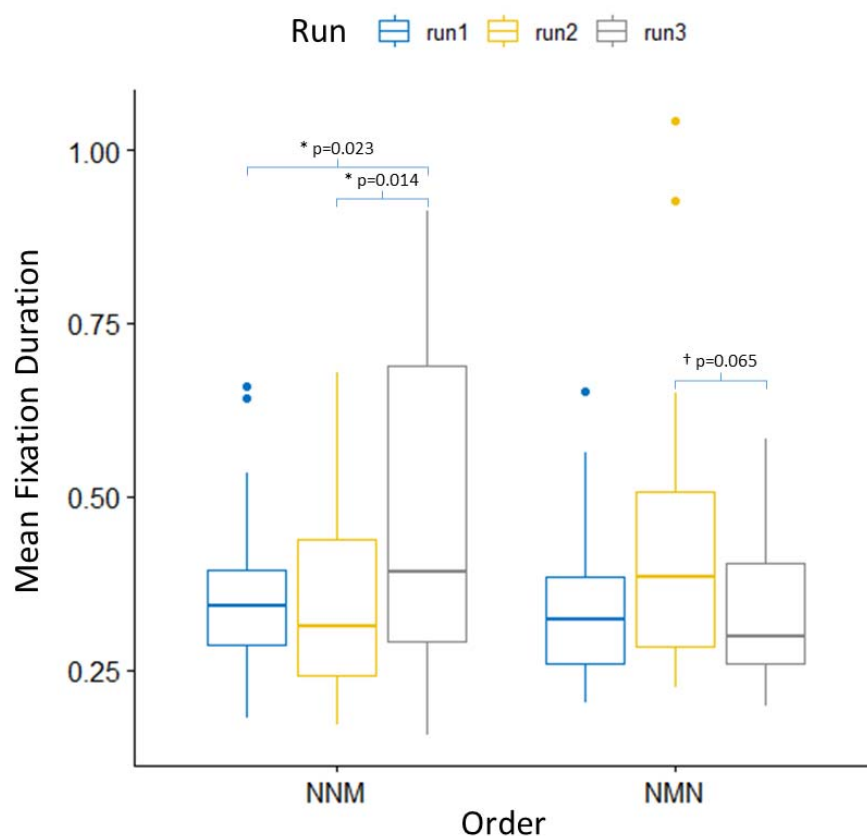

252

253 **Figure 3** Mean fixation duration across different orders and runs. Results are shown after  
254 collapsing the group factor, as BDD and CON, had a common pattern of fixation duration across  
255 the three runs for each order.

256

### 257 3.3 Brain activation patterns

258 Activation in the DVS and VVS in response to unaltered face stimuli relative to baseline was greater  
259 during 1<sup>st</sup> NatV compared with ModV for both BDD and CON (Figure S1). No significant difference was  
260 found in the activation in response to unaltered face stimuli compared with baseline for the contrast of 1<sup>st</sup>  
261 NatV vs. 2<sup>nd</sup> NatV, in BDD or CON. There was no significant difference for any contrasts between BDD  
262 and CON. There were no significant associations between activation and mean fixation duration for any  
263 condition, in BDD and CON.

### 264 3.4 Brain connectivity patterns

265 In the DVS, there were significant effects for ‘Level’ ( $p < 0.001$ ), ‘Order x Run’ ( $p < 0.001$ ), ‘Run x Level’  
266 ( $p < 0.001$ ), ‘Group x Order x Run’ ( $p = 0.001$ ), ‘Group x Order x Level’ ( $p < 0.001$ ), ‘Order x Run x Level’  
267 ( $p < 0.001$ ), and ‘Group x Order x Run x Level’ ( $p = 0.018$ ). Pairwise comparisons were computed between  
268 different runs, with a Bonferroni adjustment. For  $DVS_{Lower}$ , both BDD and CON with the NMN order  
269 showed greater DEC during 2<sup>nd</sup> NatV compared to 1<sup>st</sup> NatV and ModV (Figure 4), while both BDD and  
270 CON with the NNM order exhibited greater DEC during 1<sup>st</sup> NatV compared to 2<sup>nd</sup> NatV and ModV  
271 (Figure S2a). For  $DVS_{Higher}$ , BDD with the NMN order showed greater DEC during ModV and 2<sup>nd</sup> NatV  
272 compared to 1<sup>st</sup> NatV, while BDD with the NNM order only showed greater DEC during 2<sup>nd</sup> NatV  
273 compared to 1<sup>st</sup> NatV. However, CON with the NNM order showed greater DEC during 2<sup>nd</sup> NatV and  
274 ModV compared to 1<sup>st</sup> NatV, while CON with the NMN order only showed greater DEC during ModV  
275 compared to 1<sup>st</sup> NatV (Figure S2a). All these differences were significant at  $p < 0.05$ , corrected.

276 In the VVS, there were significant effects for ‘Run’ ( $p < 0.001$ ), ‘Level’ ( $p < 0.001$ ), ‘Order x Run’  
277 ( $p < 0.001$ ), ‘Run x Level’ ( $p < 0.001$ ), ‘Group x Order x Run’ ( $p < 0.001$ ), ‘Group x Order x Level’  
278 ( $p = 0.050$ ), ‘Group x Run x Level’ ( $p < 0.001$ ), ‘Order x Run x Level’ ( $p = 0.017$ ), and ‘Group x Order x  
279 Run x Level’ ( $p < 0.001$ ). From pairwise comparisons between different runs ( $p < 0.05$ , Bonferroni  
280 corrected), for both  $VVS_{Lower}$  and  $VVS_{Higher}$ , participants with the NNM order showed greater DEC during  
281 1<sup>st</sup> NatV compared to 2<sup>nd</sup> NatV. There was no common pattern between BDD and CON with NMN order  
282 (Figure S2b).

283

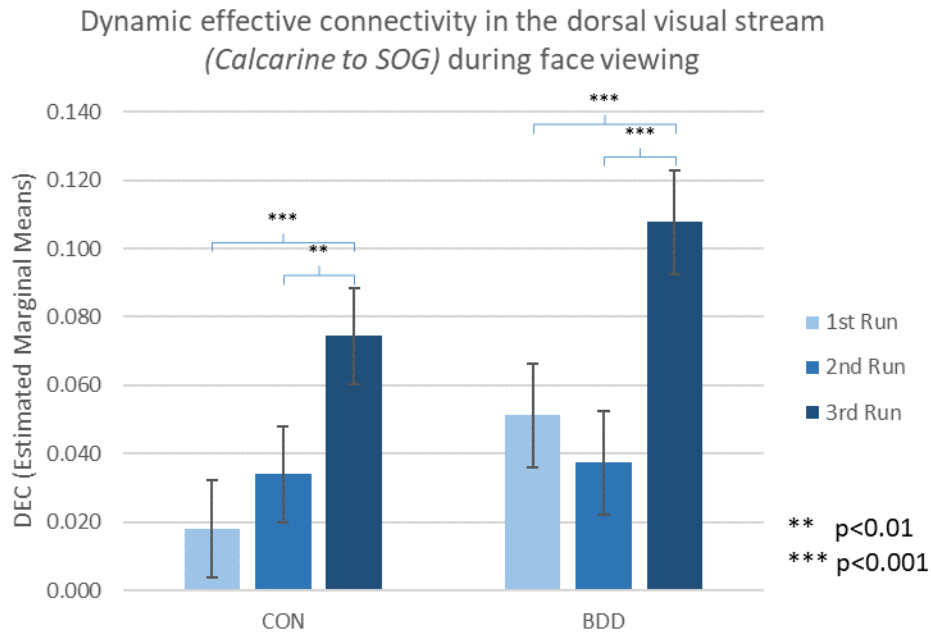

284

285 **Figure 4** Estimated marginal means of dynamic effective connectivity for the dorsal visual steam

286 (lower connections, bilateral VI to superior occipital gyrus - SOG) across CON and BDD groups

287 with the NMN order. The participants randomized to the NMN order received natural viewing

288 (N), modulated viewing (M), and then natural viewing (N) as the 1<sup>st</sup>, 2<sup>nd</sup> and 3<sup>rd</sup> runs. The p-

289 values were Bonferroni corrected.

290

### 291 3.5 Relationships between brain connectivity, visual fixation and clinical symptoms

292 For DVS<sub>Lower</sub>, participants with the NNM order exhibited greater DEC during 1<sup>st</sup> NatV compared with the

293 2<sup>nd</sup> NatV and ModV, while participants with the NMN order showed greater DEC during the 2<sup>nd</sup> NatV

294 compared to the 1<sup>st</sup> NatV and ModV. Since a common pattern of DEC changes across the 3 runs was

295 discovered for DVS<sub>Lower</sub> from the results of BDD and CON, the inter-relationships between DEC of

296 DVS<sub>Lower</sub>, visual fixation duration and clinical symptoms (BDD-YBOCS and BABS) were further

297 explored with post hoc tests. Across groups, mean fixation duration positively correlated with DEC

298 during the 2<sup>nd</sup> NatV for DVS<sub>Lower</sub> (r=0.280, p=0.04) (Figure 5); those with shorter fixation duration had

299 weaker DEC for DVS<sub>Lower</sub> during 2<sup>nd</sup> NatV. Negative trends were observed between BDD-YBOCS and

300 mean fixation duration during 1<sup>st</sup> and 2<sup>nd</sup> NatV in BDD (1<sup>st</sup> NatV:  $r=-0.301$ ,  $p=0.113$ ; 2<sup>nd</sup> NatV:  $r=-0.342$ ,  
301  $p=0.070$ ) (Figure 6); BDD individuals with more severe BDD symptom tended to have shorter fixation  
302 duration during NatV.  
303

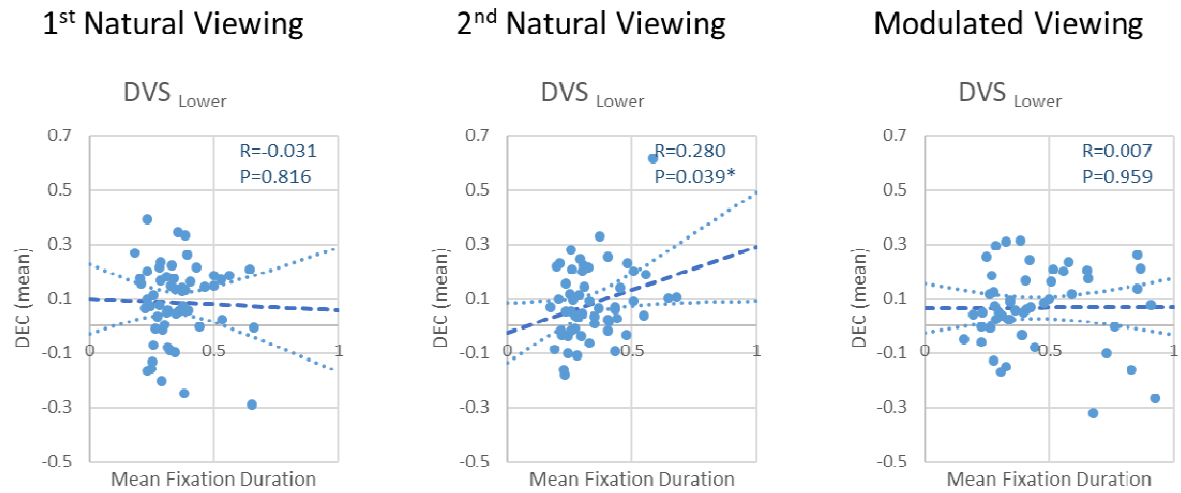

304

305 **Figure 5** *Correlations between mean dynamic effective connectivity (DEC) and mean fixation*  
306 *duration across all participants during 1<sup>st</sup> NatV, 2<sup>nd</sup> NatV, and ModV face viewing.*

307



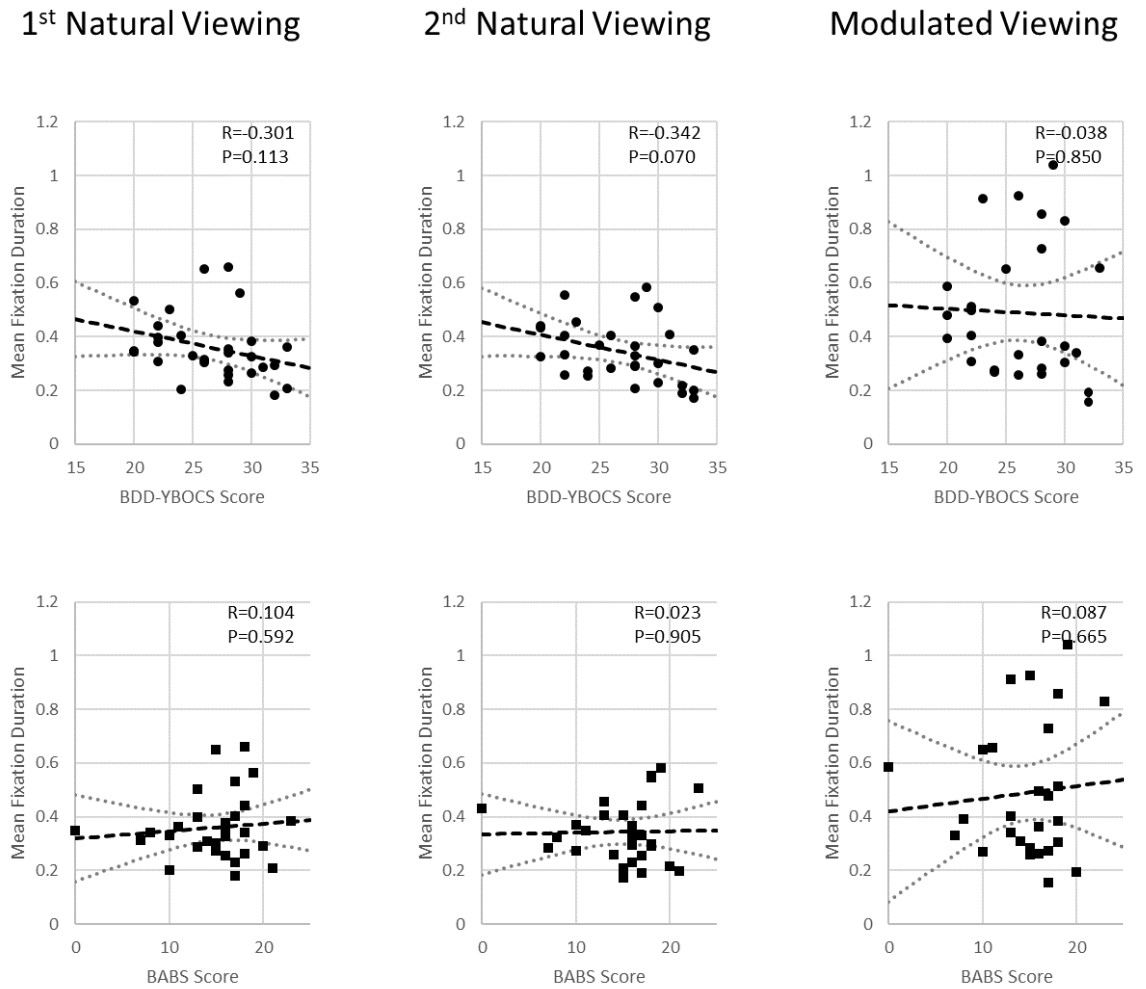

308

309

**Figure 6** Correlations between mean fixation duration and BDD-YBOCS scores and BABS scores across BDD participants during 1<sup>st</sup> NatV, 2<sup>nd</sup> NatV, and ModV.

310

311

#### 312 4 Discussion

313

The goal of this study was to understand how brain activation, connectivity, and visual fixation patterns

314

when viewing one's face – the primary area of appearance concern for most with BDD – change under

315

conditions of modulated visual attention. We specifically investigated a) how brain activation,

316

connectivity, and visual fixation are influenced by visual-attention modulation, b) if there are subsequent

317

“carryover” effects when viewing one's face naturalistically after visual-attention modulation, and c)

318

whether these effects differ in individuals with BDD compared with CON. Visual-attention modulation

319 resulted in longer fixation duration and reduced activation in DVS and VVS in BDD and CON compared  
320 with naturalistic viewing. Across groups, longer fixation duration was associated with greater dynamic  
321 effective connectivity from V1 to early DVS during the second naturalistic viewing. There was stronger  
322 connectivity from V1 to early DVS during the second naturalistic viewing following visual-attention  
323 modulation, compared with the corresponding first naturalistic viewing. Those with more severe BDD  
324 symptoms showed a trend for shorter fixation duration during naturalistic viewing. These findings shed  
325 light on the inter-relationships between brain connectivity, eye behaviors and BDD symptoms.  
326 Importantly, they demonstrate the mechanistic effects of a brief attention modulation intervention of  
327 holding gaze constant on brain connectivity and visual fixation, which may have implications for novel  
328 perceptual retraining treatment designs.

329 BDD and CON showed longer fixation duration during ModV compared with NatV. This was  
330 expected due to the task nature that required them to fixate their gaze on a centered cross. It also  
331 demonstrated overall compliance with the ModV instructions. No significant associations were found  
332 between mean fixation duration and clinical scores during ModV. This suggests that, invariant to  
333 symptom severity, BDD participants were able to visually fixate on the crosshair, which is an area of their  
334 face for which they did not have significant appearance concerns (only one potential BDD participant was  
335 deemed ineligible due to having a concern for the area corresponding to the fixation cross). Yet, there  
336 were trends for negative associations between mean fixation duration and BDD-YBOCS scores during  
337 both NatV conditions; those with more severe BDD symptoms had shorter fixation duration during NatV,  
338 a trend that was stronger during the second NatV. Previous eye-tracking studies in BDD have shown  
339 aberrant scan-paths when viewing stimuli such as faces. These scan-paths are generally characterized by  
340 either a “focused” pattern – paying attention to areas of concern, or an “avoidant” pattern – avoiding  
341 perceived defects (22,23,50,51). In these studies, BDD participants showed aberrant eye movements,  
342 including enhanced selective visual attention to imagined defects, overfocus on negative attributes, or  
343 atypical scanning behaviors with more blinks, fewer fixations, and less visual attention paid to prominent  
344 facial features. Abnormalities in face-processing seem particularly evident in BDD when viewing own-

345 faces and faces showing negative or neutral emotional expressions (50,51). In a study examining attention  
346 to attractive vs. unattractive parts of one's own and other's faces in participants with BDD, bulimia  
347 nervosa (BN), and CON, BDD and BN participants spent less time looking at attractive parts of their *own*  
348 face than CON, yet more time looking at attractive parts than unattractive parts of *other's* faces (52). This  
349 suggests ignoring of positive aspects of one's face in BDD, and/or upward social comparison, either or  
350 both of which could account for the increase in negative emotions observed in BDD after face viewing. In  
351 the current study, shorter fixation duration during NatV, in those with more severe BDD symptoms,  
352 suggests multiple short-duration fixation patterns interspersed with an increased number of saccades for  
353 scanning multiple facial details. This could reflect heightened attention to multiple perceived appearance  
354 flaws, or, alternatively, an unwillingness to fixate on any one area of their own faces more than briefly  
355 due to a triggering of negative emotions.

356 Another important finding was a positive association between fixation duration and connectivity  
357 from V1 to SOG during the second NatV, across participants. Thus, those with shorter fixation duration  
358 had weaker connectivity during the second NatV. In general, eye-movement parameters, including  
359 fixation duration and saccade amplitude, can be used to characterize distinct modes of visual processing  
360 (53), which may indicate differential involvement of dorsal and ventral systems in saccade planning and  
361 information processing. Although we did not directly quantify saccades (due to limitations of the data  
362 from the google-mounted eye-tracker camera), fixation on a crosshair would be expected to be  
363 accompanied by fewer saccades than naturalistic viewing.

364 Saccades have been found to suppress low spatial frequency (dorsal pathway) contrast sensitivity  
365 (54), suggesting a reduction of global/configural processing. Moreover, the frontal eye fields for  
366 controlling visual attention and eye movements have dense connections with the occipitoparietal network  
367 (DVS) (55), such that reduction of eye scanning (also reduced occurrence of saccades) would enhance  
368 DVS activity. Our findings corroborate this model, that longer fixation duration associates with stronger  
369 effective connectivity in the early DVS. Thus, potential changes in attentional allocation in conjunction  
370 with eye gaze behavior may have a modulatory effect on the early DVS, especially in later periods of face

371 viewing that were evident during the second NatV. Alternatively, previous studies of eye behaviors  
372 describe a “pre-attentive” mode, in which scanning eye movements are predominant with brief fixations  
373 and large saccades, while in an “attentive” mode, long fixations and small saccades are present, leading to  
374 detailed inspection (53,56,57). In theory, pre-attentive scanning behavior could reflect dorsal pathway  
375 processing, while attentive inspection behavior could reflect ventral pathway processing (53,58).  
376 However, it is important to note that the studies characterizing these viewing modes were based on scene  
377 viewing and may not apply to face processing, for which humans have high expertise and specialized  
378 visual “templates,” and did not specifically examine dynamic connectivity patterns as in the current study.

379 Contrary to our hypothesis, there were no significant group differences in connectivity from V1  
380 to DVS or V1 to VVS during the ModV or NatV conditions. Although, during the first NatV, the  
381 magnitude of connectivity was slightly lower in early DVS, and slightly higher in early and later VVS  
382 connectivity in BDD than CON (Figure S3). As the experiment was designed to test within-subject effects  
383 of ModV as the primary goal, it is possible that the study was underpowered to detect group differences in  
384 DEC owing to the number of main effects and interactions.

385 There are several important implications of these findings that could impact future translational  
386 research. These results provide early evidence that changing eye-gaze behaviors might change the balance  
387 of global vs. local processing mediated by the DVS. This has been suggested in other ongoing (59) or  
388 planned (60) treatment protocols. The observation of increased DVS connectivity during the NatV  
389 following the brief period of ModV (fixating on a non-concerning region of the face) suggests the  
390 possibility of a persistent DVS effect that may enhance global/holistic processing. A similar phenomenon  
391 was demonstrated in a study in which exposure to a Navon visual stimulus (61) – a large letter made of  
392 smaller letters that was presented in a way to promote a global bias – induced global processing and  
393 temporarily reversed visual processing biases in individuals with great body image concerns (62).

394 In this study, although there was no significant increase in visual fixation duration from ModV to  
395 the following NatV, the DVS connectivity magnitude nevertheless scaled with the fixation duration  
396 during this period. Thus, individuals with longer fixation duration, which may have persisted from the

397 preceding attention modulation, could have experienced enhanced DVS connectivity. In this second  
398 NatV, there were no explicit instructions other than to view one's face naturalistically, so changes in gaze  
399 patterns were likely implicit, although some participants might have willfully tried to reduce scanning  
400 during this period.

401         There are several limitations to consider. The study population underrepresents the proportion of  
402 males with BDD in the general population (63,64), thus findings may not generalize. Another limitation is  
403 that we did not assess participants' emotional states during face viewing (in the interest of not interrupting  
404 natural processes involved in face viewing that might be disrupted by self-reflection). Thus, we could not  
405 investigate how degree of emotional arousal, such as anxiety (65), affects visual system activity.  
406 Moreover, we were unable to use areas-of-interest on the face photographs due to limitations in positional  
407 stability of the goggle-mounted eye-tracking camera that otherwise might be informative about viewing  
408 patterns of areas of concern during NatV after ModV.

409         In conclusion, these findings provide evidence of enhanced dynamic connectivity from V1 to  
410 early DVS when viewing faces naturalistically after visual-attention modulation. This suggests that  
411 visual-attention modulation may have a subsequent carryover effect on the connectivity patterns during  
412 natural viewing of one's face afterwards, which could enhance global/configural visual processing. The  
413 clinical relevance is underscored by the observation that those with more severe BDD symptoms had  
414 shorter fixation duration, and that longer visual fixation duration associated with greater DVS  
415 connectivity. Visual-attention modulation thus holds promise for future studies of perceptual retraining  
416 for BDD.

417

418

419 **Acknowledgments**

420 The authors declare no conflicts of interest.

421 This study was supported by the National Institute of Mental Health (R21MH110865 to JDF,  
422 R01MH121520 to JDF), and the Nathan Cumming Foundation (JDF).

423

424 **Author Contributions**

425 WW, RD, JD, and NR were responsible for data analysis and paper writing. GH was responsible for  
426 statistical modeling. JDF was responsible for clinical assessment, experimental design, and paper writing.

427 All authors read and approved the submitted manuscript.

428

429 **References**

430 1. Phillips KA (2005): *The Broken Mirror*. New York, NY: Oxford University Press.

431 2. Phillips KA, Menard W (2006): Suicidality in body dysmorphic disorder: a prospective study. *Am J*  
432 *Psychiatry* 163: 1280–1282.

433 3. Phillips KA, McElroy SL, Keck PE Jr, Hudson JI, Pope HG Jr (1994): A comparison of delusional and  
434 nondelusional body dysmorphic disorder in 100 cases. *Psychopharmacol Bull* 30: 179–186.

435 4. Phillips KA (2004): Psychosis in body dysmorphic disorder. *J Psychiatr Res* 38: 63–72.

436 5. Veale D, Gledhill LJ, Christodoulou P, Hodsoll J (2016): Body dysmorphic disorder in different  
437 settings: A systematic review and estimated weighted prevalence. *Body Image* 18: 168–186.

438 6. Li W, Arienzo D, Feusner JD (2013): Body Dysmorphic Disorder: Neurobiological Features and an  
439 Updated Model. *Zeitschrift Für Klinische Psychologie Und Psychotherapie*, vol. 42. pp 184–191.

440 7. Grace SA, Labuschagne I, Kaplan RA, Rossell SL (2017): The neurobiology of body dysmorphic  
441 disorder: A systematic review and theoretical model. *Neuroscience & Biobehavioral Reviews*,  
442 vol. 83. pp 83–96.

443 8. Beilharz F, Castle DJ, Grace S, Rossell SL (2017): A systematic review of visual processing and  
444 associated treatments in body dysmorphic disorder. *Acta Psychiatr Scand* 136: 16–36.

- 445 9. Feusner JD, Moody T, Hembacher E, Townsend J, McKinley M, Moller H, Bookheimer S (2010):  
446 Abnormalities of visual processing and frontostriatal systems in body dysmorphic disorder. *Arch*  
447 *Gen Psychiatry* 67: 197–205.
- 448 10. Feusner JD, Townsend J, Bystritsky A, Bookheimer S (2007): Visual information processing of faces  
449 in body dysmorphic disorder. *Arch Gen Psychiatry* 64: 1417–1425.
- 450 11. Feusner JD, Hembacher E, Moller H, Moody TD (2011): Abnormalities of object visual processing in  
451 body dysmorphic disorder. *Psychol Med* 41: 2385–2397.
- 452 12. Li W, Lai TM, Bohon C, Loo SK, McCurdy D, Strober M, *et al.* (2015): Anorexia nervosa and body  
453 dysmorphic disorder are associated with abnormalities in processing visual information. *Psychol*  
454 *Med* 45: 2111–2122.
- 455 13. Li W, Lai TM, Loo SK, Strober M, Mohammad-Rezazadeh I, Khalsa S, Feusner J (2015): Aberrant  
456 early visual neural activity and brain-behavior relationships in anorexia nervosa and body  
457 dysmorphic disorder. *Front Hum Neurosci* 9: 301.
- 458 14. Deckersbach T, Savage CR, Phillips KA, Wilhelm S, Buhlmann U, Rauch SL, *et al.* (2000):  
459 Characteristics of memory dysfunction in body dysmorphic disorder. *J Int Neuropsychol Soc* 6:  
460 673–681.
- 461 15. Feusner JD, Moller H, Altstein L, Sugar C, Bookheimer S, Yoon J, Hembacher E (2010): Inverted  
462 face processing in body dysmorphic disorder. *J Psychiatr Res* 44: 1088–1094.
- 463 16. Jefferies K, Laws KR, Fineberg NA (2012): Superior face recognition in Body Dysmorphic Disorder.  
464 *J Obsessive Compuls Relat Disord* 1: 175–179.
- 465 17. Stangier U, Adam-Schwebe S, Müller T, Wolter M (2008): Discrimination of facial appearance  
466 stimuli in body dysmorphic disorder. *J Abnorm Psychol* 117: 435–443.
- 467 18. Mundy E M, Sadusky A (2014): Abnormalities in visual processing amongst students with body  
468 image concerns. *Adv Cogn Psychol* 10: 39–48.
- 469 19. Dhir S, Ryan HS, McKay EL, Mundy ME (2018): Parameters of visual processing abnormalities in  
470 adults with body image concerns. *PLoS One* 13: e0207585.



- 471 20. Johnson S, Williamson P, Wade TD (2018): A systematic review and meta-analysis of cognitive  
472 processing deficits associated with body dysmorphic disorder. *Behav Res Ther* 107: 83–94.
- 473 21. Phillips KA (2009): *Understanding Body Dysmorphic Disorder*. New York, NY: Oxford University  
474 Press.
- 475 22. Greenberg JL, Reuman L, Hartmann AS, Kasarskis I, Wilhelm S (2014): Visual hot spots: an eye  
476 tracking study of attention bias in body dysmorphic disorder. *J Psychiatr Res* 57: 125–132.
- 477 23. Grochowski A, Kliem S, Heinrichs N (2012): Selective attention to imagined facial ugliness is  
478 specific to body dysmorphic disorder. *Body Image* 9: 261–269.
- 479 24. Moody TD, Sasaki MA, Bohon C, Strober MA, Bookheimer SY, Sheen CL, Feusner JD (2015):  
480 Functional connectivity for face processing in individuals with body dysmorphic disorder and  
481 anorexia nervosa. *Psychol Med* 45: 3491–3503.
- 482 25. Moody TD, Morfini F, Cheng G, Sheen CL, Kerr WT, Strober M, Feusner JD (2020): Brain  
483 activation and connectivity in anorexia nervosa and body dysmorphic disorder when viewing  
484 bodies: relationships to clinical symptoms and perception of appearance. *Brain Imaging Behav.*  
485 <https://doi.org/10.1007/s11682-020-00323-5>
- 486 26. Wilhelm S, Phillips KA, Greenberg JL, O’Keefe SM, Hoepfner SS, Keshaviah A, *et al.* (2019):  
487 Efficacy and posttreatment effects of therapist-delivered cognitive behavioral therapy vs  
488 supportive psychotherapy for adults with body dysmorphic disorder: A randomized clinical trial.  
489 *JAMA Psychiatry* 76: 363–373.
- 490 27. Johnson S, Egan SJ, Andersson G, Carlbring P, Shafran R, Wade TD (2019): Internet-delivered  
491 cognitive behavioural therapy for perfectionism: Targeting dysmorphic concern. *Body Image* 30:  
492 44–55.
- 493 28. Beilharz F, Rossell SL (2017): Treatment Modifications and Suggestions to Address Visual  
494 Abnormalities in Body Dysmorphic Disorder. *J Cogn Psychother* 31: 272–284.
- 495 29. Feusner J, Deshpande R, Strober M (2017): A translational neuroscience approach to body image  
496 disturbance and its remediation in anorexia nervosa. *Int J Eat Disord* 50: 1014–1017.

- 497 30. Büchel C, Friston KJ (1998): Dynamic changes in effective connectivity characterized by variable  
498 parameter regression and Kalman filtering. *Hum Brain Mapp* 6: 403–408.
- 499 31. Eisen JL, Phillips KA, Coles ME, Rasmussen SA (2004): Insight in obsessive compulsive disorder  
500 and body dysmorphic disorder. *Compr Psychiatry* 45: 10–15.
- 501 32. Rief W, Buhlmann U, Wilhelm S, Borkenhagen A, Brähler E (2006): The prevalence of body  
502 dysmorphic disorder: a population-based survey. *Psychol Med* 36: 877–885.
- 503 33. Phillips KA, Hollander E, Rasmussen SA, Aronowitz BR, DeCaria C, Goodman WK (1997): A  
504 severity rating scale for body dysmorphic disorder: development, reliability, and validity of a  
505 modified version of the Yale-Brown Obsessive Compulsive Scale. *Psychopharmacol Bull* 33: 17–  
506 22.
- 507 34. Montgomery SA, Asberg M (1979): A new depression scale designed to be sensitive to change. *Br J*  
508 *Psychiatry* 134: 382–389.
- 509 35. Eisen JL, Phillips KA, Baer L, Beer DA, Atala KD, Rasmussen SA (1998): The Brown Assessment of  
510 Beliefs Scale: reliability and validity. *Am J Psychiatry* 155: 102–108.
- 511 36. Hamilton M (1959): The assessment of anxiety states by rating. *Br J Med Psychol* 32: 50–55.
- 512 37. Esteban O, Markiewicz CJ, Blair RW, Moodie CA, Isik AI, Erramuzpe A, *et al.* (2019): fMRIPrep: a  
513 robust preprocessing pipeline for functional MRI. *Nat Methods* 16: 111–116.
- 514 38. Woolrich MW, Ripley BD, Brady M, Smith SM (2001): Temporal autocorrelation in univariate linear  
515 modeling of FMRI data. *Neuroimage* 14: 1370–1386.
- 516 39. Woolrich MW, Behrens TEJ, Beckmann CF, Jenkinson M, Smith SM (2004): Multilevel linear  
517 modelling for FMRI group analysis using Bayesian inference. *Neuroimage* 21: 1732–1747.
- 518 40. Wu G-R, Liao W, Stramaglia S, Ding J-R, Chen H, Marinazzo D (2013): A blind deconvolution  
519 approach to recover effective connectivity brain networks from resting state fMRI data. *Med*  
520 *Image Anal* 17: 365–374.
- 521 41. Handwerker DA, Ollinger JM, D’Esposito M (2004): Variation of BOLD hemodynamic responses  
522 across subjects and brain regions and their effects on statistical analyses. *Neuroimage* 21: 1639–

- 523 1651.
- 524 42. David O, Guillemain I, SAILLET S, Reyt S, Deransart C, Segebarth C, Depaulis A (2008): Identifying  
525 neural drivers with functional MRI: an electrophysiological validation. *PLoS Biol* 6: 2683–2697.
- 526 43. Xia M, Wang J, He Y (2013): BrainNet Viewer: a network visualization tool for human brain  
527 connectomics. *PLoS One* 8: e68910.
- 528 44. Pedrotti M, Lei S, Dzaack J, Rötting M (2011): A data-driven algorithm for offline pupil signal  
529 preprocessing and eyeblink detection in low-speed eye-tracking protocols. *Behav Res Methods*  
530 43: 372–383.
- 531 45. Inhoff AW, Radach R (1998): Definition and computation of oculomotor measures in the study of  
532 cognitive processes. *Eye Guidance in Reading and Scene Perception*. Elsevier, pp 29–53.
- 533 46. Radach R, Heller D, Inhoff A (1999): Occurrence and function of very short fixation durations in  
534 reading. *Current Oculomotor Research*. Boston, MA: Springer US, pp 321–331.
- 535 47. Savitzky A, Golay MJE (1964): Smoothing and differentiation of data by simplified least squares  
536 procedures. *Anal Chem* 36: 1627–1639.
- 537 48. Mack DJ, Belfanti S, Schwarz U (2017): The effect of sampling rate and lowpass filters on saccades -  
538 A modeling approach. *Behav Res Methods* 49: 2146–2162.
- 539 49. Salvucci DD, Goldberg JH (2000): Identifying fixations and saccades in eye-tracking protocols.  
540 *Proceedings of the Symposium on Eye Tracking Research & Applications - ETRA '00*. presented  
541 at the the symposium, New York, New York, USA: ACM Press.  
542 <https://doi.org/10.1145/355017.355028>
- 543 50. Toh WL, Castle DJ, Rossell SL (2015): Facial affect recognition in body dysmorphic disorder versus  
544 obsessive-compulsive disorder: An eye-tracking study. *J Anxiety Disord* 35: 49–59.
- 545 51. Toh WL, Castle DJ, Rossell SL (2017): How individuals with body dysmorphic disorder (BDD)  
546 process their own face: a quantitative and qualitative investigation based on an eye-tracking  
547 paradigm. *Cogn Neuropsychiatry* 22: 213–232.
- 548 52. Kollei I, Horndasch S, Erim Y, Martin A (2017): Visual selective attention in body dysmorphic

- 549 disorder, bulimia nervosa and healthy controls. *J Psychosom Res* 92: 26–33.
- 550 53. Unema PJA, Pannasch S, Joos M, Velichkovsky BM (2005): Time course of information processing  
551 during scene perception: The relationship between saccade amplitude and fixation duration. *Vis*  
552 *cogn* 12: 473–494.
- 553 54. Burr DC, Morrone MC, Ross J (1994): Selective suppression of the magnocellular visual pathway  
554 during saccadic eye movements. *Nature* 371: 511–513.
- 555 55. Schall JD, Morel A, King DJ, Bullier J (1995): Topography of visual cortex connections with frontal  
556 eye field in macaque: convergence and segregation of processing streams. *J Neurosci* 15: 4464–  
557 4487.
- 558 56. Antes JR (1974): The time course of picture viewing. *J Exp Psychol* 103: 62–70.
- 559 57. Over EAB, Hooge ITC, Vlaskamp BNS, Erkelens CJ (2007): Coarse-to-fine eye movement strategy  
560 in visual search. *Vision Res* 47: 2272–2280.
- 561 58. Velichkovsky BM (2002): Heterarchy of cognition: the depths and the highs of a framework for  
562 memory research. *Memory* 10: 405–419.
- 563 59. Wilhelm S, Phillips KA, Didie E, Buhlmann U, Greenberg JL, Fama JM, *et al.* (2014): Modular  
564 cognitive-behavioral therapy for body dysmorphic disorder: a randomized controlled trial. *Behav*  
565 *Ther* 45: 314–327.
- 566 60. Beilharz F, Castle DJ, Phillipou A, Rossell SL (2018): Visual training program for body dysmorphic  
567 disorder: protocol for a novel intervention pilot and feasibility trial. *Pilot Feasibility Stud* 4: 189.
- 568 61. Navon D (1977): Forest before trees: The precedence of global features in visual perception. *Cogn*  
569 *Psychol* 9: 353–383.
- 570 62. Beilharz FL, Atkins KJ, Duncum AJF, Mundy ME (2016): Altering visual perception abnormalities:  
571 A marker for body image concern. *PLoS One* 11: e0151933.
- 572 63. Taqui AM, Shaikh M, Gowani SA, Shahid F, Khan A, Tayyeb SM, *et al.* (2008): Body Dysmorphic  
573 Disorder: gender differences and prevalence in a Pakistani medical student population. *BMC*  
574 *Psychiatry* 8: 20.

- 575 64. Koran LM, Abujaoude E, Large MD, Serpe RT (2008): The prevalence of body dysmorphic disorder  
576 in the United States adult population. *CNS Spectr* 13: 316–322.
- 577 65. Bohon C, Hembacher E, Moller H, Moody TD, Feusner JD (2012): Nonlinear relationships between  
578 anxiety and visual processing of own and others' faces in body dysmorphic disorder. *Psychiatry*  
579 *Res* 204: 132–139.
